*Panic and Social Anxiety Disorder*

**FOCUS** THE JOURNAL OF LIFELONG LEARNING IN PSYCHIATRY

Fall 2008, Volume VI, Number 4

# FOCUS



THE JOURNAL OF LIFELONG LEARNING IN PSYCHIATRY

## *Panic and Social Anxiety Disorder*

*Guest Editor, Mark H. Pollack, M.D.*

### IN CLINICAL SYNTHESIS:

Update on the Assessment, Diagnosis, and  
Treatment of Individuals with  
Social Anxiety Disorder

*Hannab DeLong, B.A.  
Mark H. Pollack, M.D.*

Assessment of Panic Disorder  
Across the Life Span

*Vishal Madaan, M.B.B.S.*

AND INFLUENTIAL PUBLICATIONS . . .
